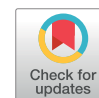

# Professional Practice Committee, American College of Cardiology—Designated Representatives, and American Diabetes Association Staff Disclosures

*Diabetes Care* 2018;41(Suppl. 1):S154–S155 | <https://doi.org/10.2337/dc18-SDIS01>

## The following financial or other conflicts of interest cover the period 12 months before December 2017

| Member                                      | Employment                                                                     | Research grant                                                                                     | Other research support |
|---------------------------------------------|--------------------------------------------------------------------------------|----------------------------------------------------------------------------------------------------|------------------------|
| Rita R. Kalyani, MD, MHS, FACP (Chair)      | Johns Hopkins University, Baltimore, MD                                        | None                                                                                               | None                   |
| Christopher P. Cannon, MD                   | Brigham and Women's Hospital, Boston, MA                                       | Amgen, Arisaph, Boehringer Ingelheim, Bristol-Myers Squibb, Daiichi Sankyo, Janssen, Merck, Takeda | None                   |
| Andrea L. Cherrington, MD, MPH              | University of Alabama, Birmingham, AL                                          | None                                                                                               | None                   |
| Donald R. Coustan, MD                       | The Warren Alpert Medical School of Brown University, Providence, RI           | None                                                                                               | None                   |
| Ian H. de Boer, MD, MS                      | University of Washington, Seattle, WA                                          | Research grant from ADA                                                                            | Medtronic, Abbott      |
| Hope Feldman, CRNP, FNP-BC                  | Abbottstown-Falls Family Practice & Counseling, Philadelphia, PA               | None                                                                                               | None                   |
| Judith Fradkin, MD                          | National Institute of Diabetes and Digestive and Kidney Diseases, Bethesda, MD | None                                                                                               | None                   |
| David Maahs, MD, PhD                        | Stanford University, School of Medicine, Stanford, CA                          | Medtronic, Dexcom, Roche, Insulet, Bigfoot                                                         | None                   |
| Melinda Maryniuk, MEd, RD, CDE              | Joslin Diabetes Center, Boston, MA                                             | None                                                                                               | None                   |
| Medha N. Munshi, MD                         | Beth Israel Deaconess Medical Center, Harvard Medical School, Boston, MA       | None                                                                                               | Common Sensing         |
| Joshua J. Neumiller, PharmD, CDE, FASCP     | Washington State University, Spokane, WA                                       | None                                                                                               | None                   |
| Guillermo E. Umpierrez, MD, CDE, FACE, FACP | Emory University, Atlanta, GA                                                  | Sanofi, Novo Nordisk, Merck, Boehringer Ingelheim, AstraZeneca                                     | None                   |
| Sandeep Das, MD, MPH <sup>^</sup>           | University of Texas Southwestern Medical Center                                | None                                                                                               | None                   |
| Mikhail Kosiborod, MD <sup>^</sup>          | University of Missouri-Kansas City School of Medicine                          | None                                                                                               | None                   |
| William T. Cefalu, MD (Staff) <sup>†</sup>  | American Diabetes Association, Arlington, VA                                   | Sanofi*#                                                                                           | None                   |
| Erika Gebel Berg, PhD (Staff)               | American Diabetes Association, Arlington, VA                                   | None                                                                                               | None                   |
| Tamara Darsow, PhD (Staff)                  | American Diabetes Association, Arlington, VA                                   | None                                                                                               | None                   |
| Matthew P. Petersen (Staff)                 | American Diabetes Association, Arlington, VA                                   | None                                                                                               | None                   |
| Sacha Uelmen, RDN, CDE (Staff)              | American Diabetes Association, Arlington, VA                                   | None                                                                                               | None                   |

| Member              | Speakers' bureau/<br>honoraria       | Ownership interest                                  | Consultant/advisory board                                                                                                                                                   | Other                                                                                                                                                                                                                           |
|---------------------|--------------------------------------|-----------------------------------------------------|-----------------------------------------------------------------------------------------------------------------------------------------------------------------------------|---------------------------------------------------------------------------------------------------------------------------------------------------------------------------------------------------------------------------------|
| R.R.K.              | None                                 | None                                                | None                                                                                                                                                                        | None                                                                                                                                                                                                                            |
| C.P.C.              | None                                 | None                                                | Alnylam, Amarin, Amgen, Arisaph, AstraZeneca, Boehringer Ingelheim, Bristol-Myers Squibb, Eisai, GlaxoSmithKline, Kowa, Lipimedix, Merck, Pfizer, Regeneron, Sanofi, Takeda | None                                                                                                                                                                                                                            |
| A.L.C.              | AstraZeneca (Women Scientists Board) | Connection Health (Volunteer Chief Medical Officer) | None                                                                                                                                                                        | Coinvestigator, drug study by Merck Sharp & Dohme; Site investigator, drug study by Boehringer Ingelheim                                                                                                                        |
| D.R.C.              | None                                 | None                                                | None                                                                                                                                                                        | None                                                                                                                                                                                                                            |
| I.H.d.B.            | None                                 | None                                                | Boehringer Ingelheim, Janssen, Ironwood                                                                                                                                     | None                                                                                                                                                                                                                            |
| H.F.                | None                                 | None                                                | None                                                                                                                                                                        | Member, American Diabetes Association Primary Care Advisory Group; Member, <i>Diabetes Spectrum</i> Editorial Board                                                                                                             |
| J.F.                | None                                 | None                                                | None                                                                                                                                                                        | None                                                                                                                                                                                                                            |
| D.M.                | None                                 | None                                                | Insulet, Helmsely Charitable Trust                                                                                                                                          | Editorial Boards, <i>The Journal of Pediatrics and Diabetes Technology &amp; Therapeutics</i> ; Associate Editor, <i>Diabetic Medicine</i> ; and Secretary-General, International Society for Pediatric and Adolescent Diabetes |
| M.M.                | None                                 | None                                                | None                                                                                                                                                                        | None                                                                                                                                                                                                                            |
| M.N.M.              | Novo Nordisk, Sanofi, Eli Lilly      | None                                                | Sanofi                                                                                                                                                                      | None                                                                                                                                                                                                                            |
| J.J.N.              | None                                 | None                                                | None                                                                                                                                                                        | Editor in Chief, <i>Diabetes Spectrum</i>                                                                                                                                                                                       |
| G.E.U.              | None                                 | None                                                | Sanofi                                                                                                                                                                      | Member, Endocrine Society Council Member, American Association of Clinical Endocrinologists Board of Directors<br>Editor in Chief, <i>BMJ Open Diabetes Research &amp; Care</i>                                                 |
| S.D. <sup>^</sup>   | None                                 | None                                                | Roche Diagnostic                                                                                                                                                            | None                                                                                                                                                                                                                            |
| M.K. <sup>^</sup>   | None                                 | None                                                | AstraZeneca, Sanofi, GlaxoSmithKline, Amgen, Boehringer Ingelheim, Novo Nordisk, Merck (Diabetes), Eisai, ZS Pharma, Glytec, Janssen, Intarcia, Novartis                    | None                                                                                                                                                                                                                            |
| W.T.C. <sup>†</sup> | None                                 | None                                                | Sanofi, Intarcia, Adocia                                                                                                                                                    | Former Editor in Chief, <i>Diabetes Care</i>                                                                                                                                                                                    |
| E.G.B.              | None                                 | None                                                | None                                                                                                                                                                        | None                                                                                                                                                                                                                            |
| T.D.                | None                                 | None                                                | None                                                                                                                                                                        | None                                                                                                                                                                                                                            |
| M.P.P.              | None                                 | None                                                | None                                                                                                                                                                        | None                                                                                                                                                                                                                            |
| S.U.                | None                                 | None                                                | None                                                                                                                                                                        | None                                                                                                                                                                                                                            |

<sup>^</sup>American College of Cardiology—designated representative (Section 9); \* $\geq$ \$10,000 per year from company to individual; #grant or contract is to university or other employer; <sup>†</sup>prior to joining ADA, no active disclosures.
